# Supplementary material
Source: PubMed Central journal article supplement (PMC5772252)
Supplement: AEM.01937-17_zam003188287s1.pdf [file AEM.01937-17_zam003188287s1.pdf]

## SUPPLEMENTARY INFORMATION

### *Sinorhizobium meliloti* glutathione reductase is required for both redox homeostasis and symbiosis

This file contains Supplementary Figure S1.

#### Supplemental figure

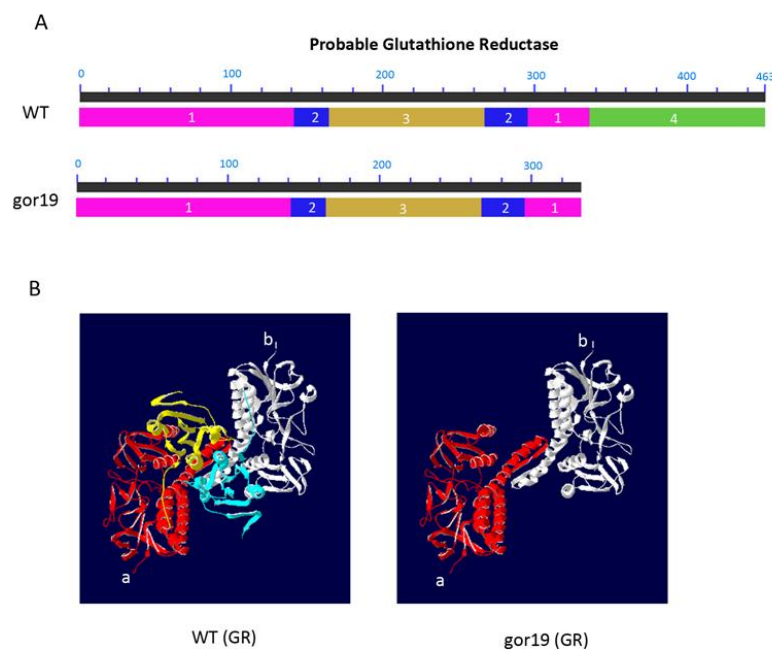

FIG S1 The structure of GR in the *S. meliloti* 1021 (WT) and gor19 strains

(A) The domain of GR in the WT and gor19 strains. The gor gene of *S. meliloti* Rm1021 encodes 463 amino acids and has four domains: Domain 1 (positions 1-141 and 295-335), Domain 2 (positions 142-158 and 265-294), Domain 3 (position 159-264), and Domain 4 (position 336-463). The plasmid inserted into the 332<sup>nd</sup> amino acid of the GR gene, causing Domain 4 to be deleted in the gor19 strain. (B) Structure of GR from WT and gor19 strains. a, b represent two chains of GR. Crystal structure of GR from *S. meliloti* 1021 comes from page site <https://www.ncbi.nlm.nih.gov/Structure/pdb/4DNA>.
